# Supplementary material for: Olfactory mucosa mesenchymal stem cells alleviate pulmonary fibrosis via the immunomodulation and reduction of inflammation
Source: Springer Nature journal article supplement (doi:10.1186/s12890-023-02834-5), 2024-01-05

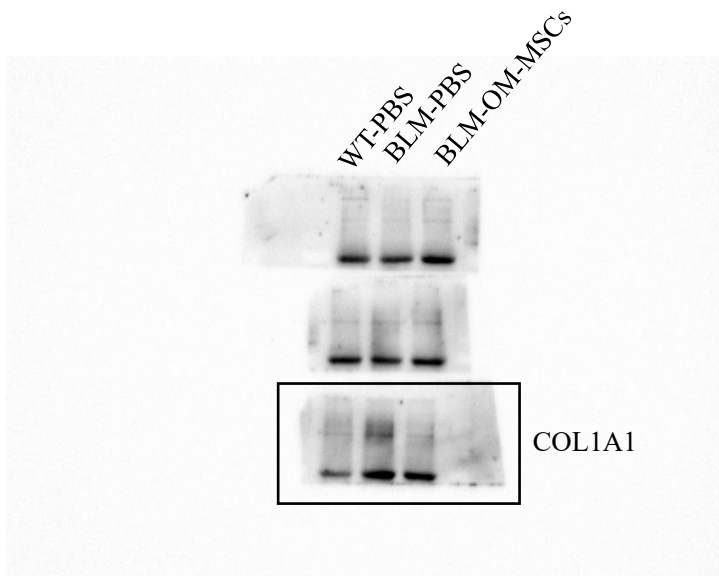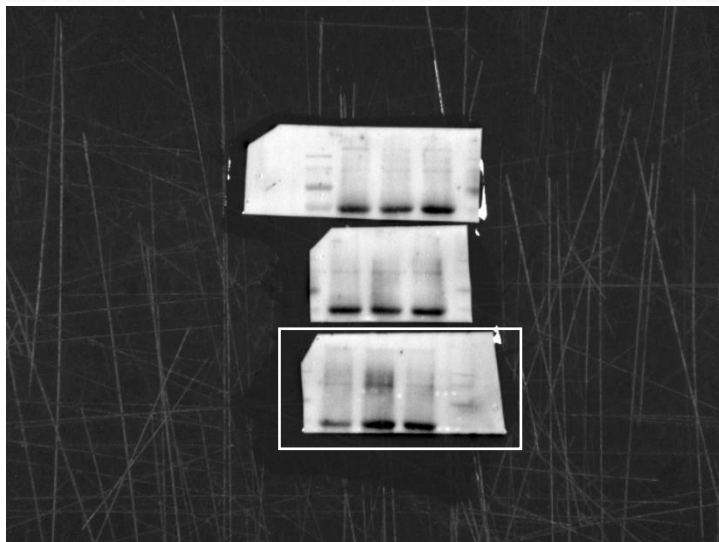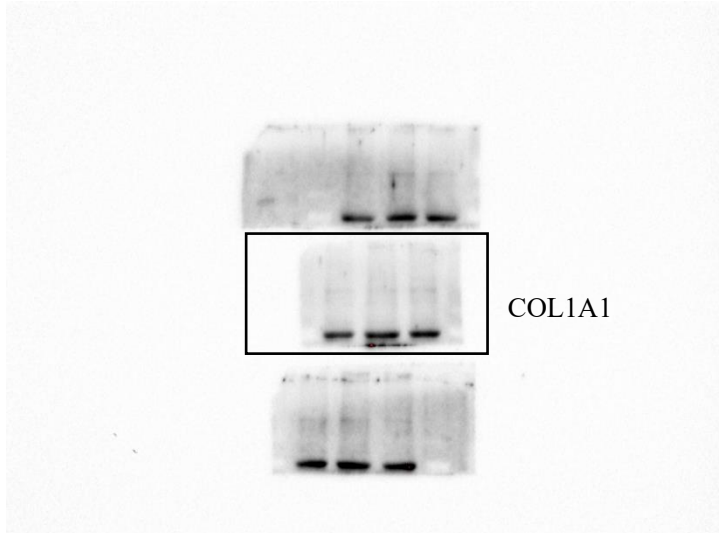

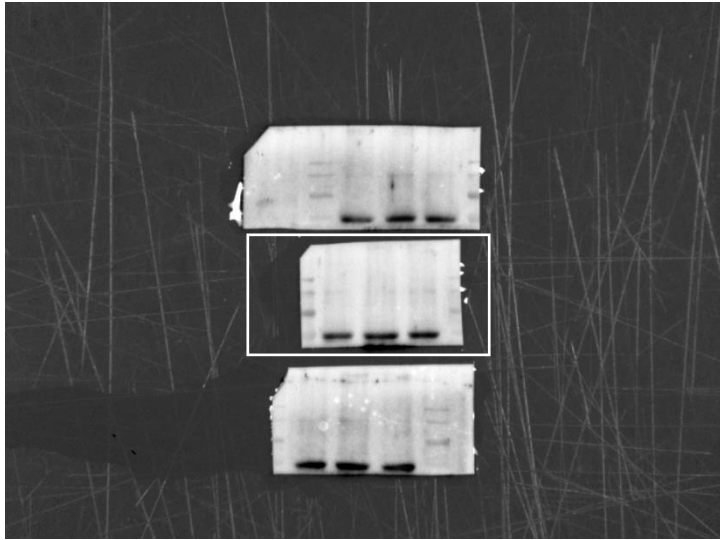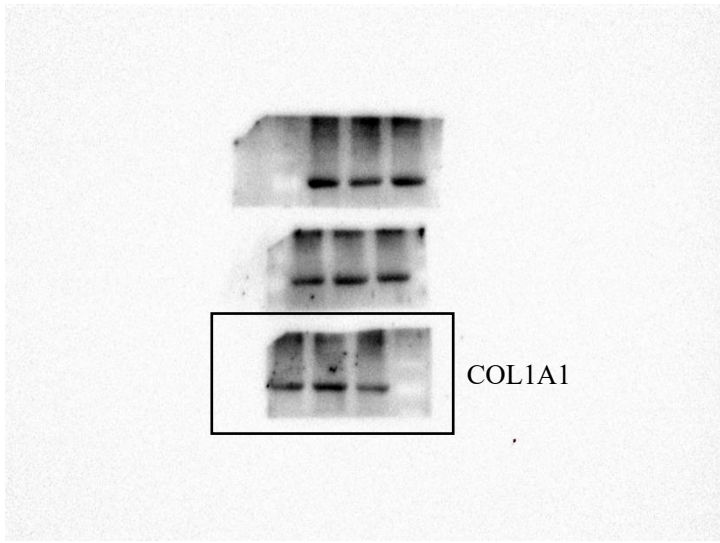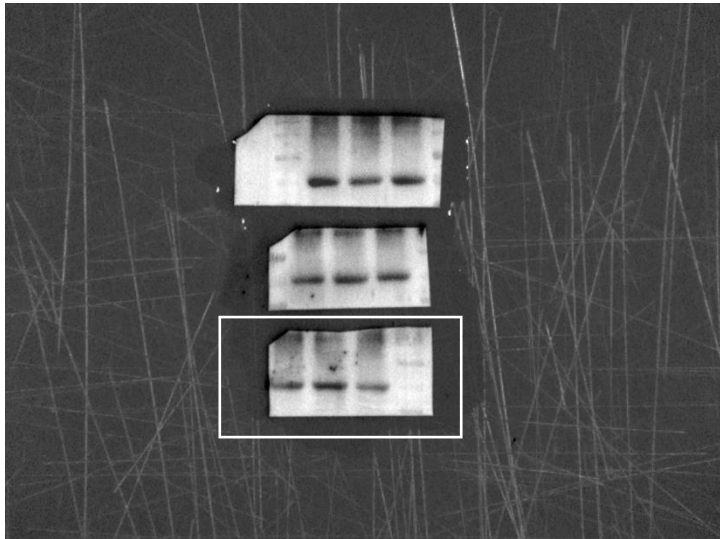

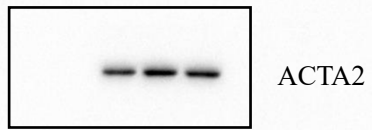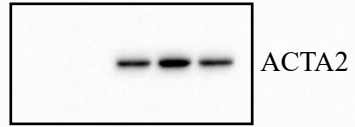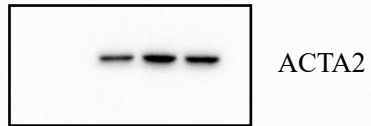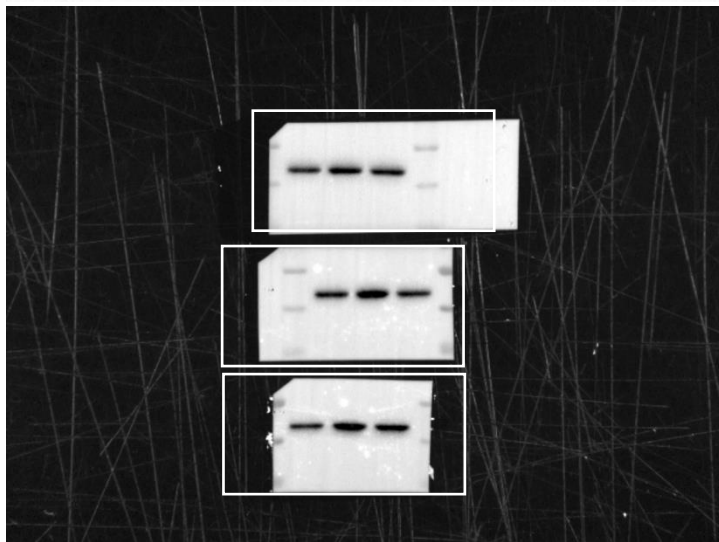

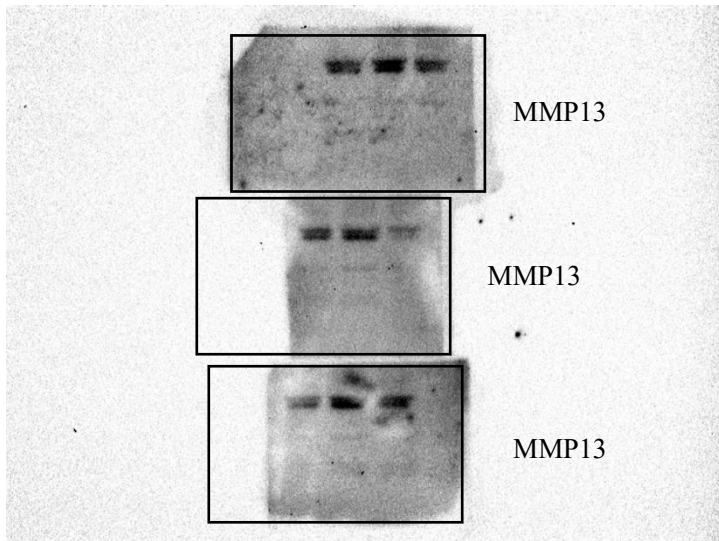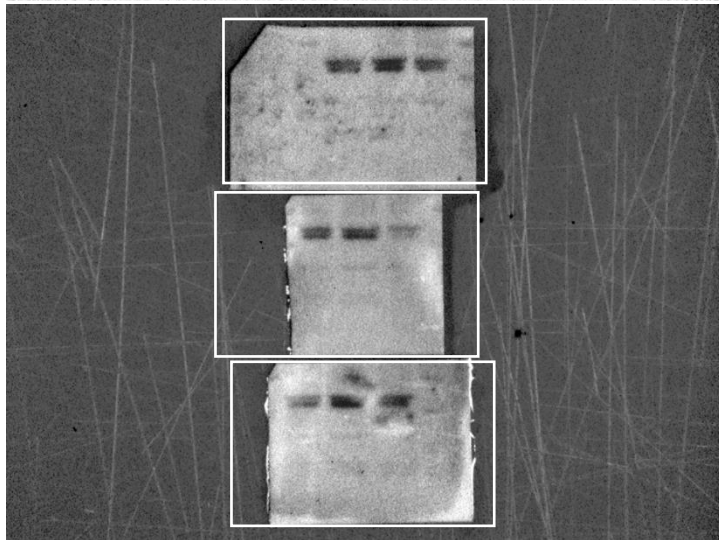

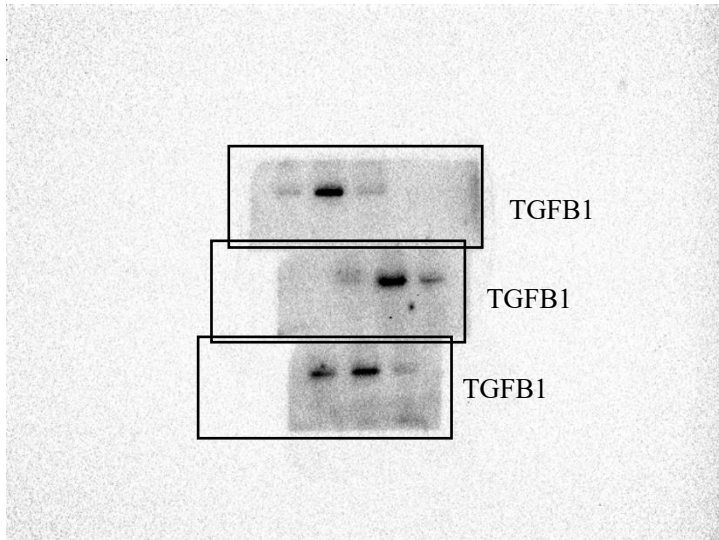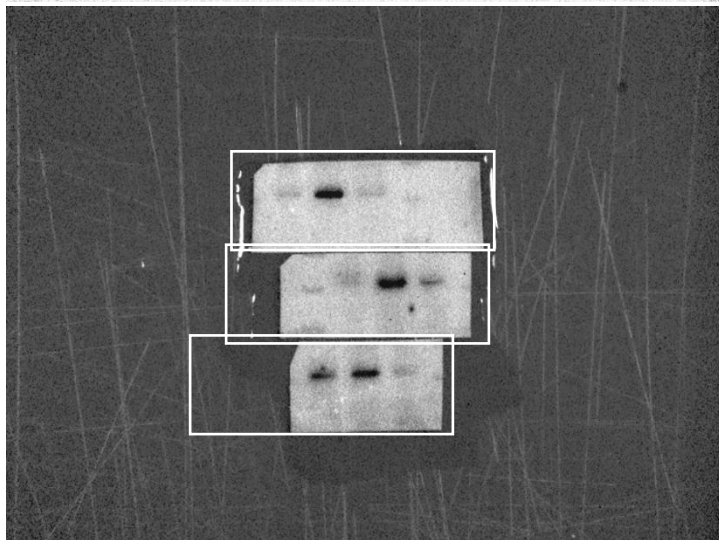

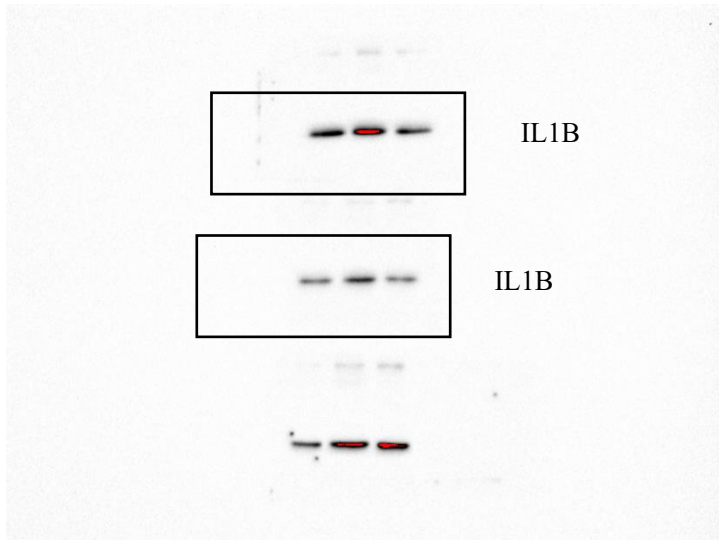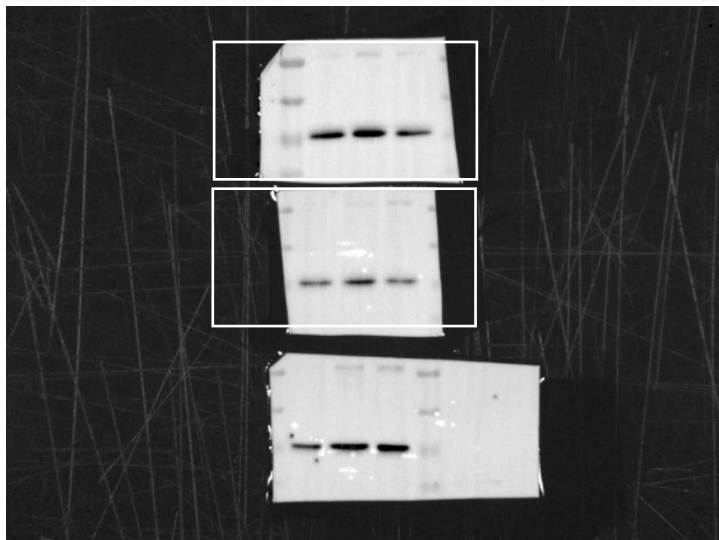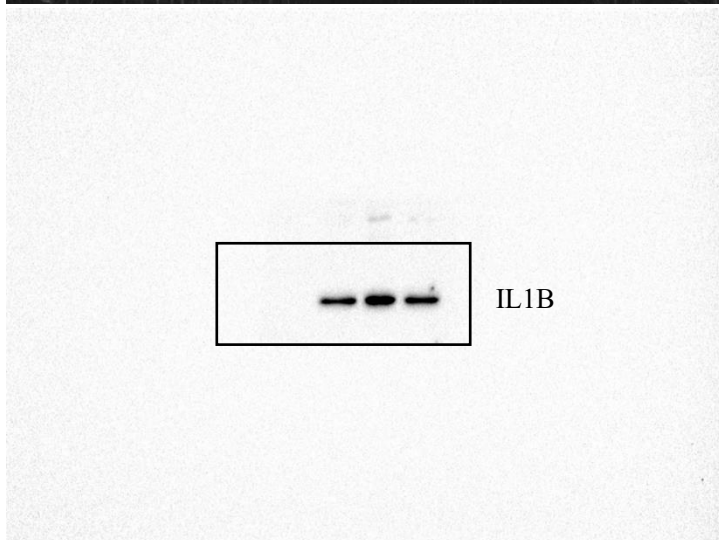

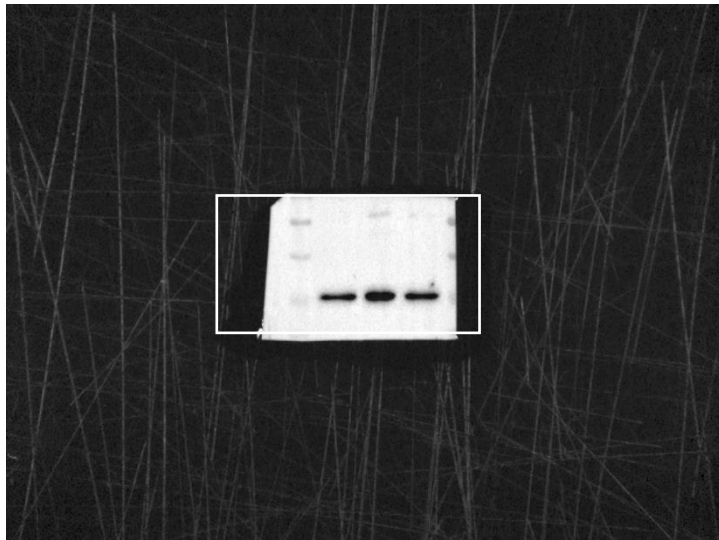

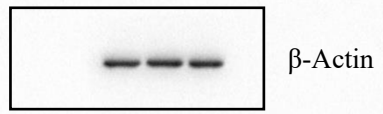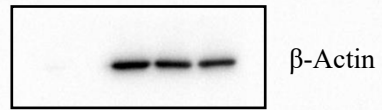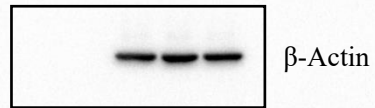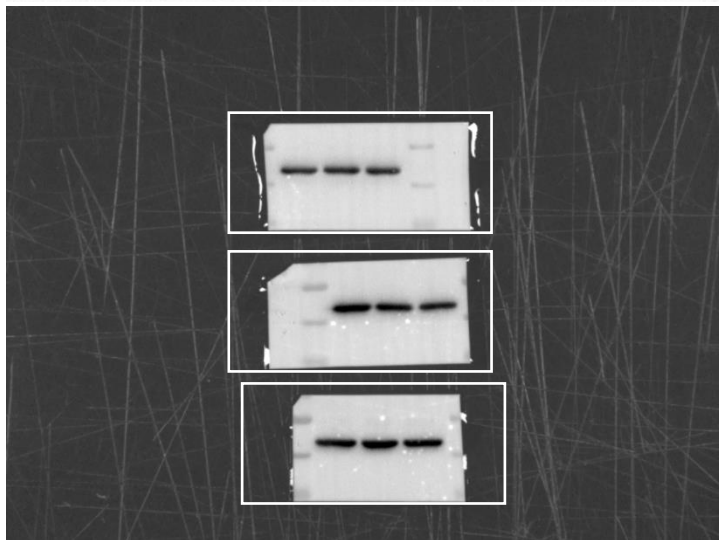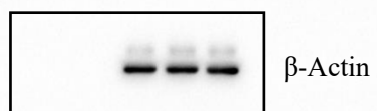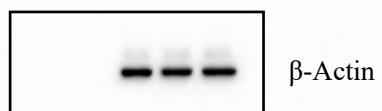



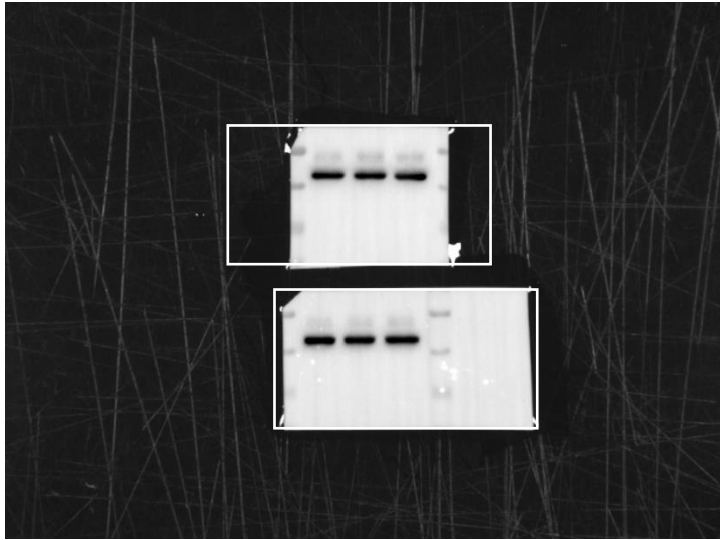

Supplement: MOESM2 [file 26600524]
