# Supplementary material for: Olfactory mucosa mesenchymal stem cells alleviate pulmonary fibrosis via the immunomodulation and reduction of inflammation
Source: Springer Nature journal article supplement (doi:10.1186/s12890-023-02834-5), 2024-01-05
Supplement: MOESM1 [file 26600524]

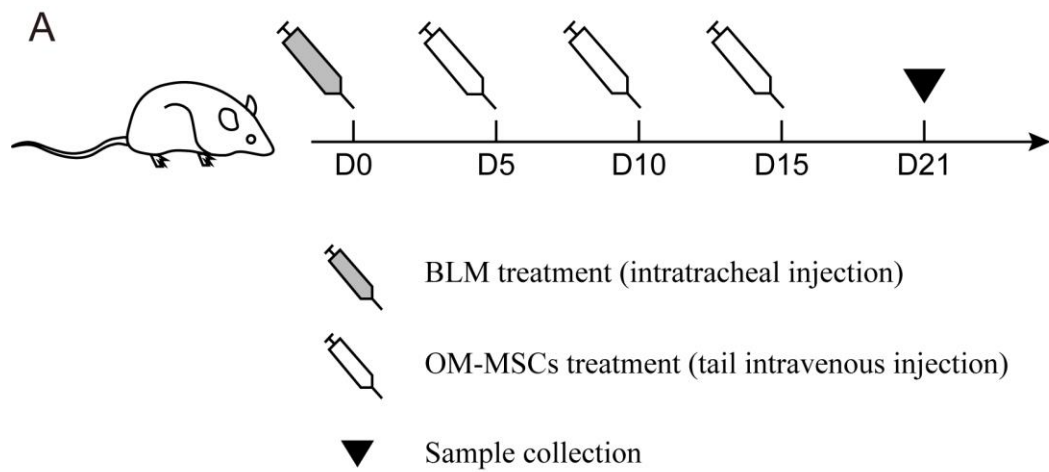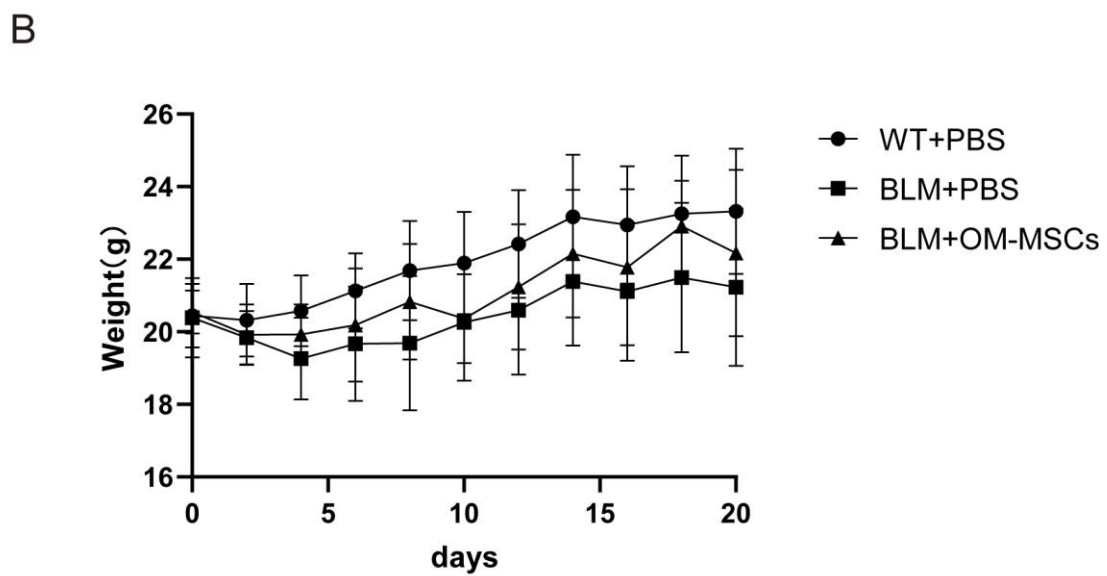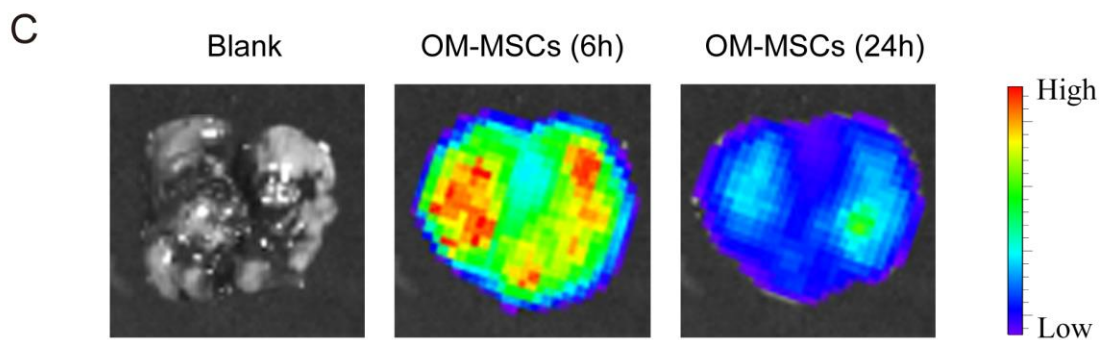

**Supplementary File. 1** | (A) Schematic of generating BLM-induced PF. (B) Body weight of control mice or BLM-induced mice with or without OM-MSCs treatment.  $n = 10$  per group. (C) Fluorescence image of distribution of OM-MSCs.
